# Supplementary material
Source: ML conference proceedings conference paper supplement (https://openreview.net/forum?id=c3PxSjfUYZ)
Supplement: supplementary_material [file attachment]

# PDL Quick Reference

pip install prompt-declaration-language

pdl examples/hello/hello.pdl

## LLM call with current context

```
model: watsonx/ibm/granite-13b-chat-v2
parameters:
  temperature: 0.1
```

## LLM call with explicit input

```
model: watsonx/ibm/granite-13b-chat-v2
parameters:
  temperature: 0.1
input:
  array:
    - role: user
      content: Hello,
```

## Reading from a file or stdin

```
read: # optionally, add file name
message: Please enter an input.
multiline: true # omit to stop at \n
```

## Creating data (v1, v2 can be any block)

```
text: # outputs "v1v2"
  - v1
  - v2

lastOf: # outputs v2
  - v1
  - v2

array: # outputs [v1, v2]
  - v1
  - v2

object: # outputs {k1: v1, k2: v2}
  k1: v1
  k2: v2

data: # outputs {k1: v1, model: v2}
  k1: v1
  model: v2 # no LLM call
```

## Including a PDL file

```
import: helper_defs
```

## Declaring and calling functions

```
def: add
function:
  x: int
  y: int
return: ${x + y}

call: ${add}
args:
  x: 2
  y: 2
pdl_context: [] # optional
```

## Control constructs

```
if: ${x > 0}
then: positive
else: non-negative

match: ${x}
with:
  - case: one
    then: 1
  - case: two
    then: 2

for: # outputs 2_0_5
  i: [1, 0, 1]
  j: [2, 3, 5]
repeat: ${i * j}
join:
  with: _ # optional

repeat: # outputs HiHiHi
  text: Hi
num_iterations: 3

repeat:
  def: x
  read:
until: ${ (x | trim) == "stop" }
```

## Optional keywords for any block

```
description: documentation text

def: x # define variable from block

defs: # define multiple variables
  x: v1
  y: v2

role: user # or system or assistant

contribute: [result, context] # or less

parser: json # or jsonl, yaml, regex

spec: type # type specification
```

## Executing code

```
lang: python # or jinja, pdl
code: result = "Hello, world!"
```

## spec Types (shorthand for JSON Schema)

|             |                             |
|-------------|-----------------------------|
| Basic types | str, int, float, bool, null |
| Arrays      | [int]                       |
| Objects     | {x: int, y: int}            |
| Enums       | {enum: [red, green, blue]}  |

## \${...} Expressions (subset of Jinja2)

|              |                                                      |
|--------------|------------------------------------------------------|
| Basic values | "hi", 5, 3.1, true, none                             |
| Arrays       | [1, 2, 3]                                            |
| Objects      | {"x": 4, "y": 5}                                     |
| Variables    | x, y[0], z.f                                         |
| Operators    | +, -, *, /, //, %, **, ~, and, or, not, ==, <, >, in |
| Tests        | x if x is defined else 0                             |
| Filters      | x   default(0)                                       |
